# Supplementary material for: Plant hairy roots for the production of extracellular vesicles with antitumor bioactivity
Source: PubMed Central journal article supplement (PMC9392725; doi:10.1038/s42003-022-03781-3), 2022-08-20
Supplement: 42003_2022_3781_MOESM2_ESM.pdf [file 42003_2022_3781_MOESM2_ESM.pdf]

# Plant hairy roots for the production of extracellular vesicles with antitumor bioactivity

Eleonora Boccia<sup>1#</sup>, Mariaevelina Alfieri<sup>1,2#</sup>, Raffaella Belvedere<sup>1</sup>, Valentina Santoro<sup>1</sup>, Marianna Colella, Pasquale Del Gaudio<sup>1</sup>, Maria Moros<sup>3,4</sup>, Fabrizio Dal Piaz<sup>5,6</sup>, Antonello Petrella<sup>1</sup>, Antonietta Leone<sup>1</sup>, Alfredo Ambrosone<sup>1\*</sup>

## Affiliations

<sup>1</sup> Department of Pharmacy, University of Salerno, 84084, Fisciano, Italy;

<sup>2</sup> Clinical Pathology, Pausilipon Hospital, A.O.R.N Santobono-Pausilipon, 80123, Naples, Italy

<sup>3</sup> Instituto de Nanociencia y Materiales de Aragón (INMA), CSIC-Universidad de Zaragoza, Zaragoza, Spain

<sup>4</sup> Biomedical Research Networking Center in Bioengineering, Biomaterials and Nanomedicine (CIBER-BBN), Spain

<sup>5</sup> Department of Medicine, Surgery and Dentistry “Scuola Medica Salernitana”, University of Salerno, 84081 Baronissi, Italy

<sup>6</sup> Operative Unit of Clinical Pharmacology, University Hospital “San Giovanni di Dio e Ruggi d’Aragona”, 84131 Salerno, Italy

# these authors contributed equally

\*Correspondence: [aambrosone@unisa.it](mailto:aambrosone@unisa.it);

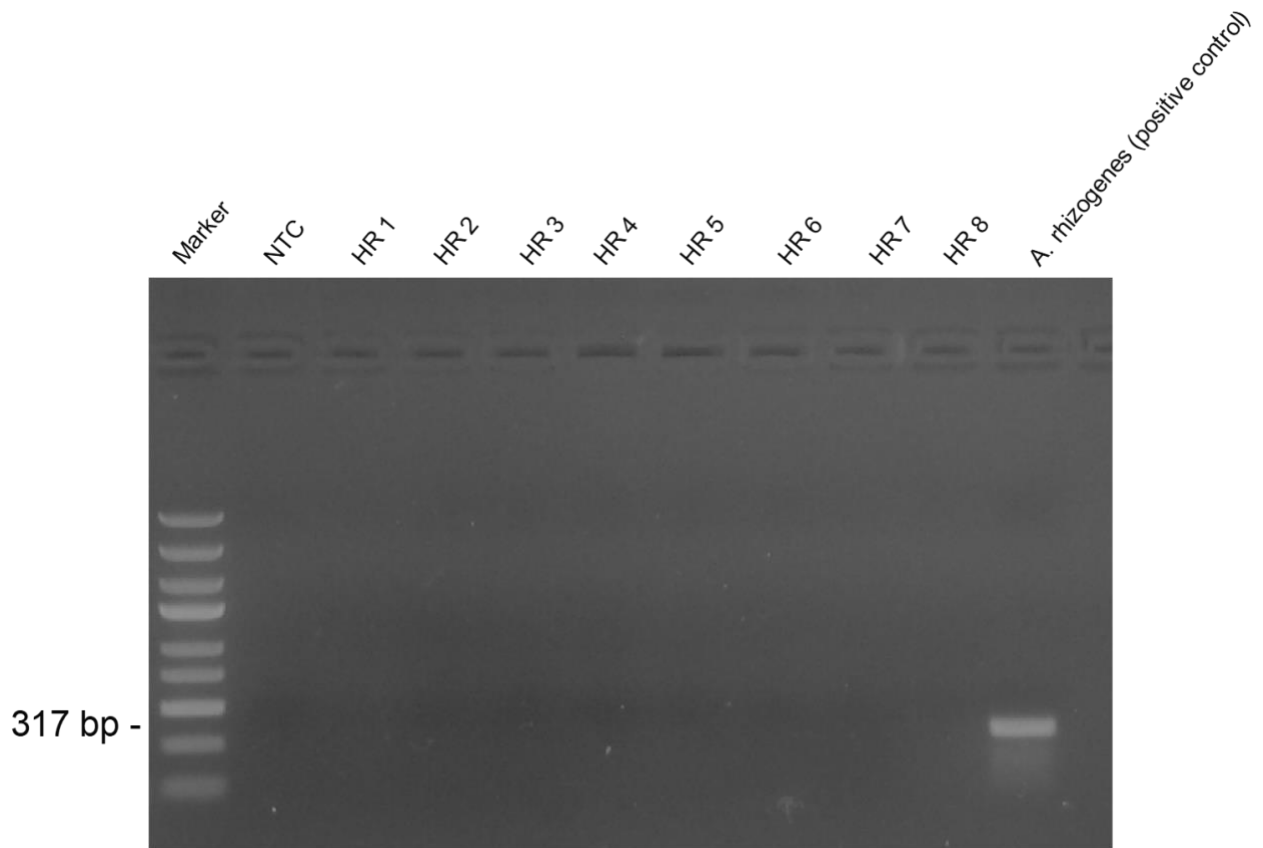

Figure S1. *VirD2* amplification by PCR in independent hairy root lines (HR). Genomic DNA from *Agrobacterium rhizogenes* was used as a positive control

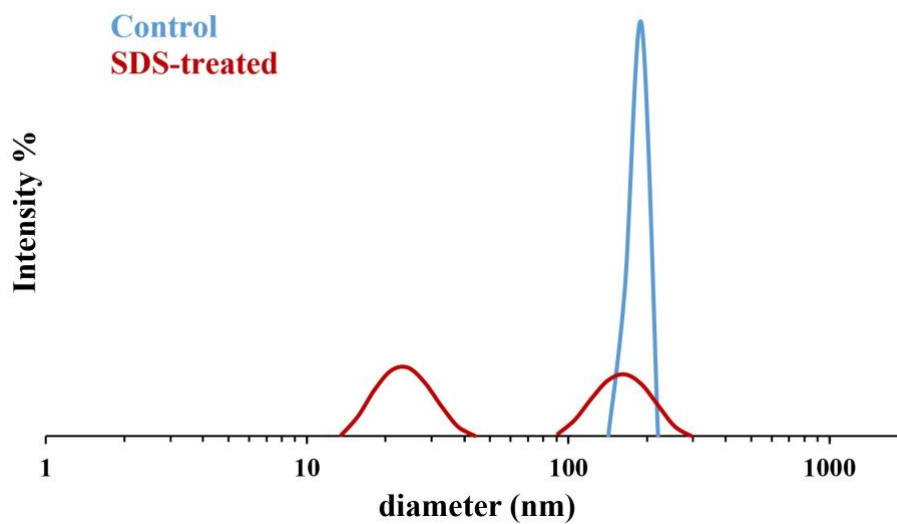

Figure S2. Particle-size distributions measured using dynamic light scattering in HR-derived EVs treated with 1% SDS (red line) and in native EV preparations (blue line).

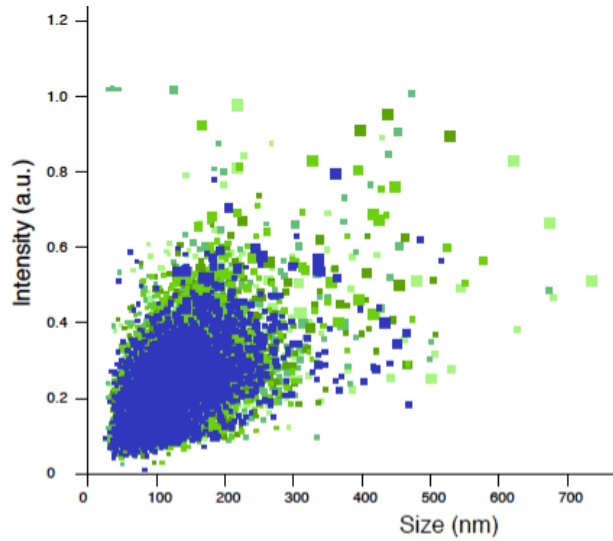

Figure S3. EV size distribution by NTA intensity measurements. Colours (from green to blue) represent size distribution of five independent measurements.

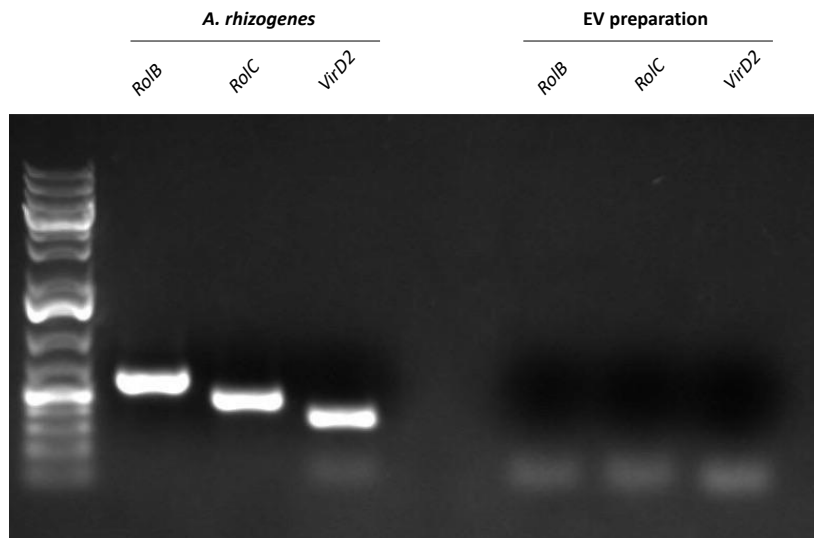

Figure S4. Absence of *rolB*, *rolC* and *virD2* genes in EV preparation checked by PCR. As positive control *A. rhizogenes* DNA has been used.

Table S1. Proteins identified only in *S. dominica* HR-derived EV by proteomic analyses performed on two independent experiments

| Accession   | Description                                                                                                            |
|-------------|------------------------------------------------------------------------------------------------------------------------|
| G3PC_DIACA  | Glyceraldehyde-3-phosphate dehydrogenase, cytosolic OS= <i>Dianthus caryophyllus</i>                                   |
| G3PC2_ORYSJ | Glyceraldehyde-3-phosphate dehydrogenase 2, cytosolic OS= <i>Oryza sativa</i> subsp. <i>japonica</i>                   |
| EF1A1_DAUCA | Elongation factor 1-alpha OS= <i>Daucus carota</i>                                                                     |
| HSP70_SOYBN | Heat shock 70 kDa protein OS= <i>Glycine max</i>                                                                       |
| METE1_ORYSJ | 5-methyltetrahydropteroyltriglutamate--homocysteine methyltransferase 1 OS= <i>Oryza sativa</i> subsp. <i>japonica</i> |
| BIP1_ARATH  | Heat shock 70 kDa protein BIP1 OS= <i>Arabidopsis thaliana</i>                                                         |
| ALF2_PEA    | Fructose-bisphosphate aldolase, cytoplasmic isozyme 2 OS= <i>Pisum sativum</i>                                         |
| METE3_ARATH | 5-methyltetrahydropteroyltriglutamate--homocysteine methyltransferase 3, chloroplastic OS= <i>Arabidopsis th</i>       |
| API3_SOLTU  | Aspartic protease inhibitor 3 (Fragment) OS= <i>Solanum tuberosum</i>                                                  |
| PGKH2_ARATH | Phosphoglycerate kinase 2, chloroplastic OS= <i>Arabidopsis thaliana</i>                                               |
| 1433B_TOBAC | 14-3-3-like protein B OS= <i>Nicotiana tabacum</i>                                                                     |
| 14337_ARATH | 14-3-3-like protein GF14 nu OS= <i>Arabidopsis thaliana</i>                                                            |
| CDC48_SOYBN | Cell division cycle protein 48 homolog OS= <i>Glycine max</i>                                                          |
| ATPAM_SOYBN | ATP synthase subunit alpha, mitochondrial OS= <i>Glycine max</i>                                                       |
| LOX1_LENCU  | Linoleate 9S-lipoxygenase OS= <i>Lens culinaris</i>                                                                    |
| 14331_SOLTU | 14-3-3-like protein OS= <i>Solanum tuberosum</i>                                                                       |
| MDHM_CITLA  | Malate dehydrogenase, mitochondrial OS= <i>Citrullus lanatus</i>                                                       |
| ENPL_CATRO  | Endoplasmic reticulum chaperone homolog OS= <i>Catharanthus roseus</i>                                                 |
| VCL1_PEA    | Vicilin, 14 kDa component OS= <i>Pisum sativum</i>                                                                     |
| ENO2_ARATH  | Bifunctional enolase 2/transcriptional activator OS= <i>Arabidopsis thaliana</i>                                       |
| 14339_SOLLC | 14-3-3 protein 9 OS= <i>Solanum lycopersicum</i>                                                                       |
| PHSL_VICFA  | Alpha-1,4 glucan phosphorylase L isozyme, chloroplastic/amyloplastic OS= <i>Vicia faba</i>                             |
| FRI_PHAVU   | Ferritin, chloroplastic OS= <i>Phaseolus vulgaris</i>                                                                  |
| RS31_ARATH  | 40S ribosomal protein S3-1 OS= <i>Arabidopsis thaliana</i>                                                             |
| RS8_MAIZE   | 40S ribosomal protein S8 OS= <i>Zea mays</i>                                                                           |
| RAA2C_ARATH | Ras-related protein RABA2c OS= <i>Arabidopsis thaliana</i>                                                             |
| RSSA_DAUCA  | 40S ribosomal protein SA OS= <i>Daucus carota</i>                                                                      |
| MANA1_ARATH | Alpha-mannosidase At3g26720 OS= <i>Arabidopsis thaliana</i>                                                            |
| RS6_ASPOF   | 40S ribosomal protein S6 OS= <i>Asparagus officinalis</i>                                                              |
| IF4A1_ARATH | Eukaryotic initiation factor 4A-1 OS= <i>Arabidopsis thaliana</i>                                                      |
| HSP80_SOLLC | Heat shock cognate protein 80 OS= <i>Solanum lycopersicum</i>                                                          |
| RGP1_ARATH  | UDP-arabinopyranose mutase 1 OS= <i>Arabidopsis thaliana</i>                                                           |
| NDK1_SOYBN  | Nucleoside diphosphate kinase 1 OS= <i>Glycine max</i>                                                                 |
| MANA2_ARATH | Probable alpha-mannosidase At5g13980 OS= <i>Arabidopsis thaliana</i>                                                   |
| GLYC4_ARATH | Serine hydroxymethyltransferase 4 OS= <i>Arabidopsis thaliana</i>                                                      |
| PGKY_WHEAT  | Phosphoglycerate kinase, cytosolic OS= <i>Triticum aestivum</i>                                                        |
| TCTP_MAIZE  | Translationally-controlled tumor protein homolog OS= <i>Zea mays</i>                                                   |
| RL12_PRUAR  | 60S ribosomal protein L12 OS= <i>Prunus armeniaca</i>                                                                  |
| SCRK_SOLTU  | Fructokinase OS= <i>Solanum tuberosum</i>                                                                              |
| RL11_MEDSA  | 60S ribosomal protein L11 OS= <i>Medicago sativa</i>                                                                   |

DPYS\_ARATH Dihydropyrimidinase OS=Arabidopsis thaliana  
 RAE1E\_ARATH Ras-related protein RABE1e OS=Arabidopsis thaliana  
 CALR\_MAIZE Calreticulin OS=Zea mays  
 AB43G\_ORYSJ ABC transporter G family member 43 OS=Oryza sativa subsp. japonica  
 NLTP\_DAUCA Non-specific lipid-transfer protein OS=Daucus carota  
 MANA\_CANEN Alpha-mannosidase OS=Canavalia ensiformis  
 REHY\_MEDTR 1-Cys peroxiredoxin OS=Medicago truncatula  
 RS4\_GOSHI 40S ribosomal protein S4 OS=Gossypium hirsutum  
 FTHS\_SPIOL Formate--tetrahydrofolate ligase OS=Spinacia oleracea  
 UXS3\_ARATH UDP-glucuronic acid decarboxylase 3 OS=Arabidopsis thaliana  
 NLTP1\_VIGRR Non-specific lipid-transfer protein 1 OS=Vigna radiata var. radiata  
 RS30\_ARATH 40S ribosomal protein S30 OS=Arabidopsis thaliana  
 CALR\_PRUAR Calreticulin OS=Prunus armeniaca  
 RS254\_ARATH 40S ribosomal protein S25-4 OS=Arabidopsis thaliana  
 MDHC\_MAIZE Malate dehydrogenase, cytoplasmic OS=Zea mays  
 RB11A\_TOBAC Ras-related protein Rab11A OS=Nicotiana tabacum  
 RL73\_ARATH 60S ribosomal protein L7-3 OS=Arabidopsis thaliana  
 UGDH3\_ARATH UDP-glucose 6-dehydrogenase 3 OS=Arabidopsis thaliana  
 YPTV2\_VOLCA GTP-binding protein yptV2 OS=Volvox carteri  
 H4\_ARATH Histone H4 OS=Arabidopsis thaliana  
 BADH1\_ARATH Aminoaldehyde dehydrogenase ALDH10A8, chloroplastic OS=Arabidopsis thaliana  
 OBP2B\_MAIZE Oil body-associated protein 2B OS=Zea mays  
 RL182\_ARATH 60S ribosomal protein L18-2 OS=Arabidopsis thaliana  
 AADH2\_PEA Aminoaldehyde dehydrogenase 2, peroxisomal OS=Pisum sativum  
 RLA0\_SOYBN 60S acidic ribosomal protein P0 OS=Glycine max  
 LEGB\_PEA Legumin B (Fragment) OS=Pisum sativum  
 SODC5\_MAIZE Superoxide dismutase [Cu-Zn] 4AP OS=Zea mays  
 RGP1\_PHODC Probable UDP-arabinopyranose mutase 1 (Fragments) OS=Phoenix dactylifera  
 ACO3M\_ARATH Aconitate hydratase 3, mitochondrial OS=Arabidopsis thaliana  
 RS12\_HORVU 40S ribosomal protein S12 OS=Hordeum vulgare  
 LOX4\_SOYBN Linoleate 9S-lipoxygenase-4 OS=Glycine max  
 SUS\_SOYBN Sucrose synthase OS=Glycine max OX=3847 GN=SS PE=1 SV=  
 RS19\_ORYSJ 40S ribosomal protein S19 OS=Oryza sativa subsp. japonica  
 G6P11\_CLAFR Glucose-6-phosphate isomerase, cytosolic 1 OS=Clarkia franciscana  
 RL40A\_ARATH Ubiquitin-60S ribosomal protein L40-1 OS=Arabidopsis thaliana  
 TENAE\_SOYBN Probable bifunctional TENA-E protein OS=Glycine max  
 REHY\_MAIZE 1-Cys peroxiredoxin PER1 OS=Zea mays  
 RAA4A\_ARATH Ras-related protein RABA4a OS=Arabidopsis thaliana  
 SNAK1\_SOLTU Snakin-1 OS=Solanum tuberosum  
 FTHS\_ARATH Formate--tetrahydrofolate ligase OS=Arabidopsis thaliana  
 RL9\_PEA 60S ribosomal protein L9 OS=Pisum sativum  
 RS281\_ARATH 40S ribosomal protein S28-1 OS=Arabidopsis thaliana  
 CP18C\_ARATH Peptidyl-prolyl cis-trans isomerase CYP18-3 OS=Arabidopsis thaliana  
 RS16\_FRIAG 40S ribosomal protein S16 OS=Fritillaria agrestis  
 RS13\_SOYBN 40S ribosomal protein S13 OS=Glycine max  
 TET7\_ARATH Tetraspanin-7 OS=Arabidopsis thaliana

R10A1\_ARATH 60S ribosomal protein L10a-1 OS=Arabidopsis thaliana  
MASY\_SOYBN Malate synthase, glyoxysomal (Fragment) OS=Glycine max  
PDIA6\_MEDSA Probable protein disulfide-isomerase A6 OS=Medicago sativa  
ANX4\_FRAAN Annexin-like protein RJ4 OS=Fragaria ananassa  
TBB3\_SOYBN Tubulin beta chain (Fragment) OS=Glycine max  
TIP31\_ARATH Aquaporin TIP3-1 OS=Arabidopsis thaliana  
GBLP\_SOYBN Guanine nucleotide-binding protein subunit beta-like protein OS=Glycine max  
CONA1\_LUPAN Conglutin alpha 1 OS=Lupinus angustifolius  
MAOX\_POPTR NADP-dependent malic enzyme OS=Populus trichocarpa  
ACBP5\_ARATH Acyl-CoA-binding domain-containing protein 5 OS=Arabidopsis thaliana  
RS141\_MAIZE 40S ribosomal protein S14 OS=Zea mays  
SODM\_HEVBR Superoxide dismutase [Mn], mitochondrial OS=Hevea brasiliensis  
GDI\_ARATH Guanosine nucleotide diphosphate dissociation inhibitor At5g09550 OS=Arabidopsis thaliana  
PGMP\_PEA Phosphoglucomutase, chloroplastic OS=Pisum sativum  
COPDA\_ARATH Probable cytosolic oligopeptidase A OS=Arabidopsis thaliana  
IF5A1\_SOLTU Eukaryotic translation initiation factor 5A-1/2 OS=Solanum tuberosum  
GLYG1\_SOYBN Glycinin G1 OS=Glycine max  
ALL11\_ARAHY Allergen Ara h 1, clone P17 OS=Arachis hypogaea  
ALL12\_ARAHY Allergen Ara h 1, clone P41B OS=Arachis hypogaea  
GLCA1\_SOYBN Beta-conglycinin alpha subunit 1 OS=Glycine max  
H32\_CICIN Histone H3.2 OS=Cichorium intybus  
EBF1\_ARATH EIN3-binding F-box protein 1 OS=Arabidopsis thaliana  
RGA3\_SOLBU Putative disease resistance protein RGA3 OS=Solanum bulbocastanum  
RLM1B\_ARATH Disease resistance protein RML1B OS=Arabidopsis thaliana  
PERN1\_TOBAC Peroxidase N1 OS=Nicotiana tabacum  
G3PC2\_HORVU Glyceraldehyde-3-phosphate dehydrogenase 2, cytosolic (Fragment) OS=Hordeum vulgare  
GRDH\_DAUCA Glucose and ribitol dehydrogenase OS=Daucus carota  
SUVH7\_ARATH Histone-lysine N-methyltransferase, H3 lysine-9 specific SUVH7 OS=Arabidopsis thaliana  
GDL77\_ARATH GDSL esterase/lipase At5g18430 OS=Arabidopsis thaliana  
TB1\_ORYSJ Transcription factor TB1 OS=Oryza sativa subsp. japonica  
BXL4\_ARATH Beta-D-xylosidase 4 OS=Arabidopsis thaliana  
TAF1\_ARATH Transcription initiation factor TFIID subunit 1 OS=Arabidopsis thaliana  
BBE14\_ARATH Berberine bridge enzyme-like 14 OS=Arabidopsis thaliana  
EGY2\_ARATH Probable zinc metalloprotease EGY2, chloroplastic OS=Arabidopsis thaliana  
ACT\_ACEPE Actin (Fragment) OS=Acetabularia peniculus  
CRS1\_MAIZE Chloroplastic group IIA intron splicing facilitator CRS1, chloroplastic OS=Zea mays  
STSYN\_PEA Stachyose synthase OS=Pisum sativum  
GLYG4\_SOYBN Glycinin G4 OS=Glycine max  
GLUA1\_ORYSJ Glutelin type-A 1 OS=Oryza sativa subsp. japonica  
KN5B\_ARATH Kinesin-like protein KIN-5B OS=Arabidopsis thaliana  
CDPK8\_ORYSJ Calcium-dependent protein kinase 8 OS=Oryza sativa subsp. japonica  
RCA\_CHLRE Ribulose biphosphate carboxylase/oxygenase activase, chloroplastic OS=Chlamydomonas reinhardtii  
SSG1\_ORYGL Granule-bound starch synthase 1, chloroplastic/amyloplastic OS=Oryza glaberrima  
NUA\_ARATH Nuclear-pore anchor OS=Arabidopsis thaliana  
GLYG2\_SOYBN Glycinin G2 OS=Glycine max  
ALA8\_ARATH Probable phospholipid-transporting ATPase 8 OS=Arabidopsis thaliana

|             |                                                                                                     |
|-------------|-----------------------------------------------------------------------------------------------------|
| POD1_ARATH  | Protein POLLEN DEFECTIVE IN GUIDANCE 1 OS=Arabidopsis thaliana                                      |
| Y1143_ARATH | Probable LRR receptor-like serine/threonine-protein kinase At1g14390 OS=Arabidopsis thaliana        |
| FTSI1_ARATH | Probable inactive ATP-dependent zinc metalloprotease FTSHI 1, chloroplastic OS=Arabidopsis thaliana |
| CFM9_ARATH  | CRM-domain containing factor CFM9, mitochondrial OS=Arabidopsis thaliana                            |
| TI10A_ARATH | Protein TIFY 10A OS=Arabidopsis thaliana                                                            |
| NORK_MEDTR  | Nodulation receptor kinase OS=Medicago truncatula                                                   |
| PP306_ARATH | Pentatricopeptide repeat-containing protein At4g11690 OS=Arabidopsis thaliana                       |
| MAOP1_ARATH | NADP-dependent malic enzyme 1 OS=Arabidopsis thaliana                                               |
| FDM1_ARATH  | Factor of DNA methylation 1 OS=Arabidopsis thaliana                                                 |
| WBC30_ARATH | Putative white-brown complex homolog protein 30 OS=Arabidopsis thaliana                             |
| HDG9_ARATH  | Homeobox-leucine zipper protein HDG9 OS=Arabidopsis thaliana                                        |

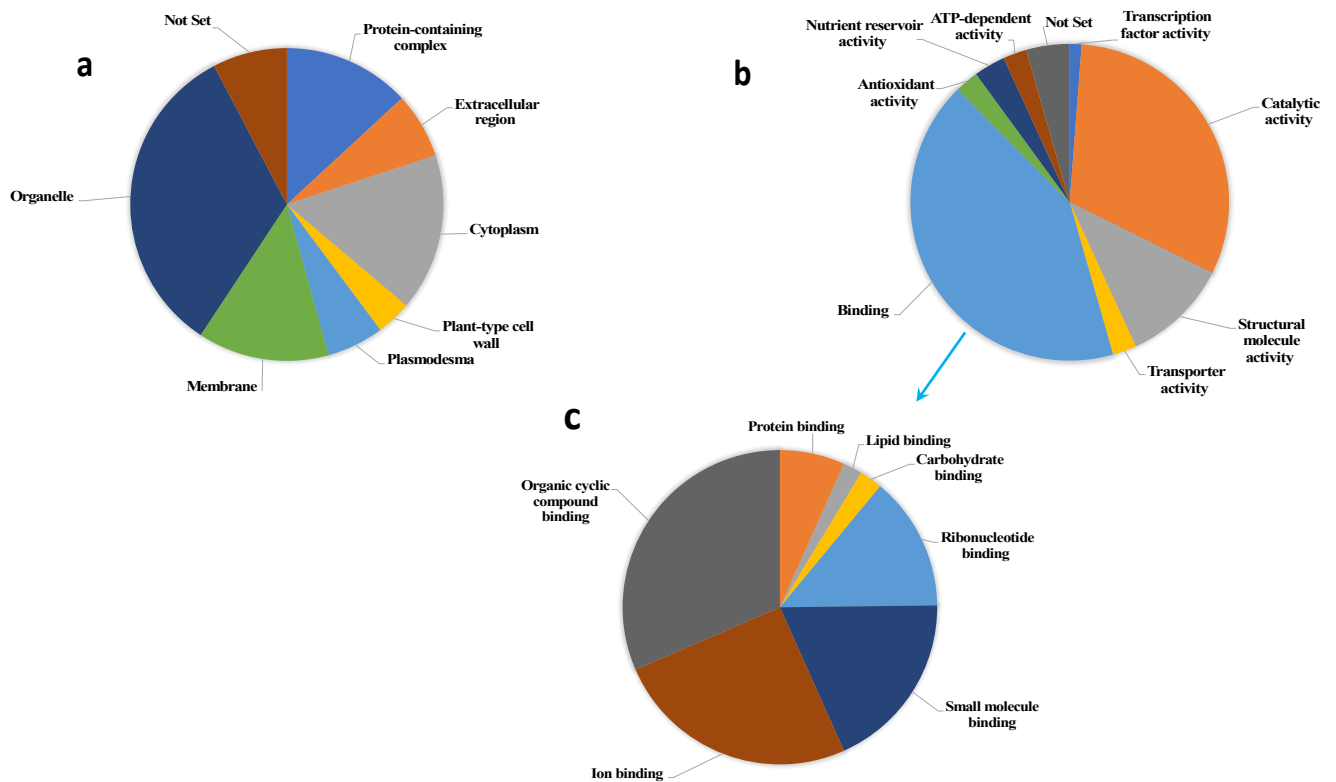

Figure S5. Distribution of Gene Ontology annotation of proteins selectively identified in HR-derived EV preparations. **a** Cell components analysis; **b** and **c** Molecular function analysis.

Confocal microscopy imaging of Mia PaCa-2 cells

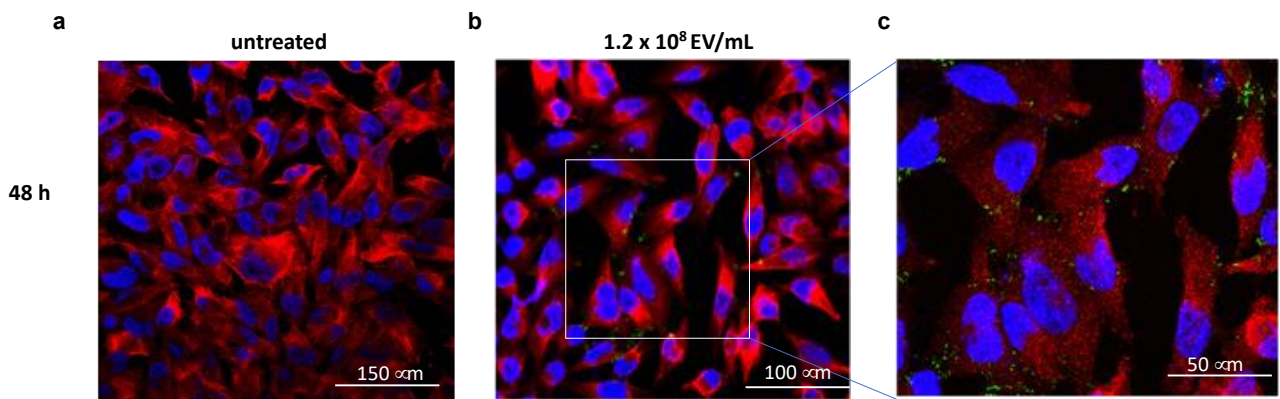

**Figure S6. EV uptake in MIA PaCa-2 cells after 48 h incubation.** **a** untreated MIA PaCa-2 cells. **b** MIA PaCa-2 cells treated with Fluo-EVs for 48 h. **c** Close up view of b. Scale bars: 150  $\mu\text{m}$  in a and b, 50  $\mu\text{m}$  in c.

Confocal microscopy analysis of MIA PaCa-2 cells grown in FBS-free medium

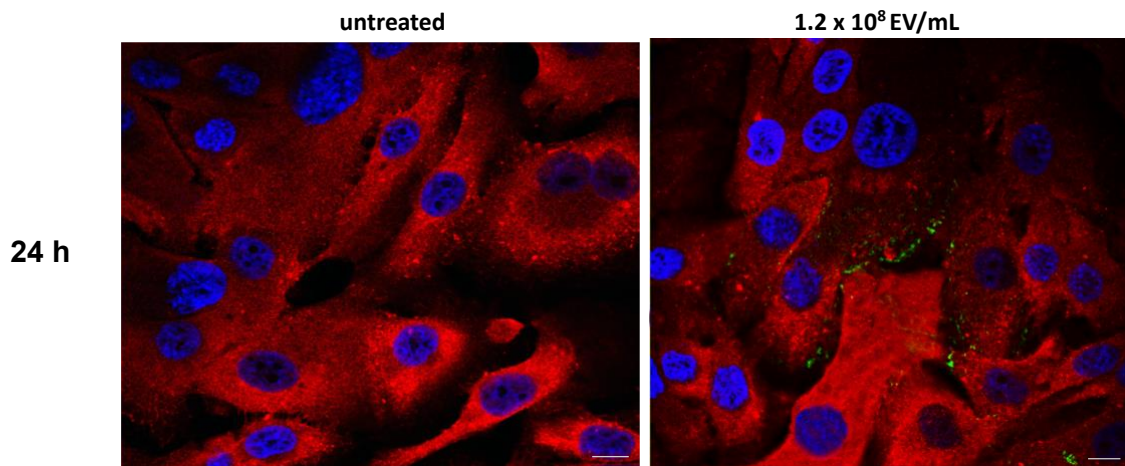

**Figure S7. HR-derived EV uptake in MIA PaCa-2 cells after 24 h incubation in a Fetal Bovine Serum-free medium.** Scale bars: 50 $\mu\text{m}$ .



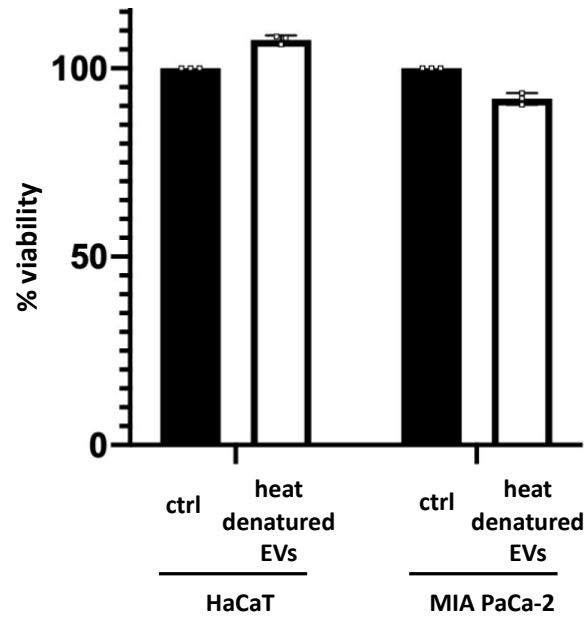

Figure S8. Effects of heat-denatured HR-derived EVs ( $3 \times 10^8$  particle/mL) after 24 h incubation in human keratinocytes and MIA PaCa-2 cancer cells. The values were presented as means  $\pm$  SD of three independent experiments carried out in triplicate.

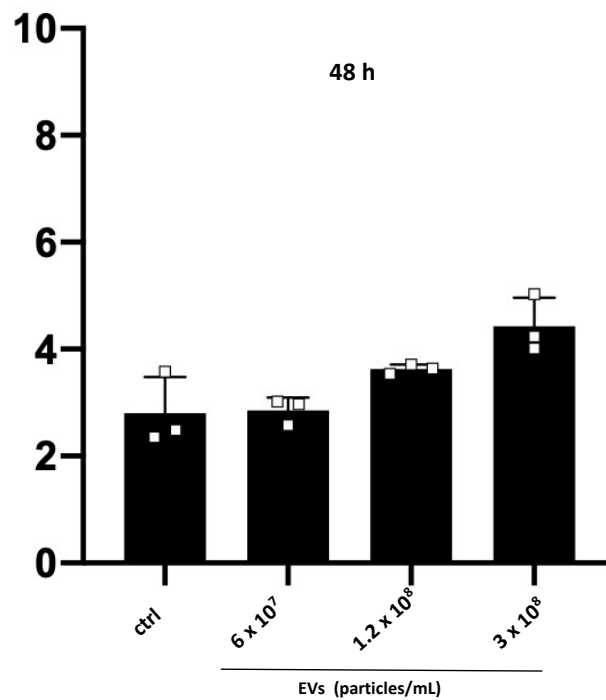

Figure S9. Apoptotic cell counts by cytofluorimetric assay in EVs-treated HaCat cells upon 48 h exposure. The values reported in the graphs are the mean  $\pm$  SD from 3 independent experiments performed in technical triplicates.

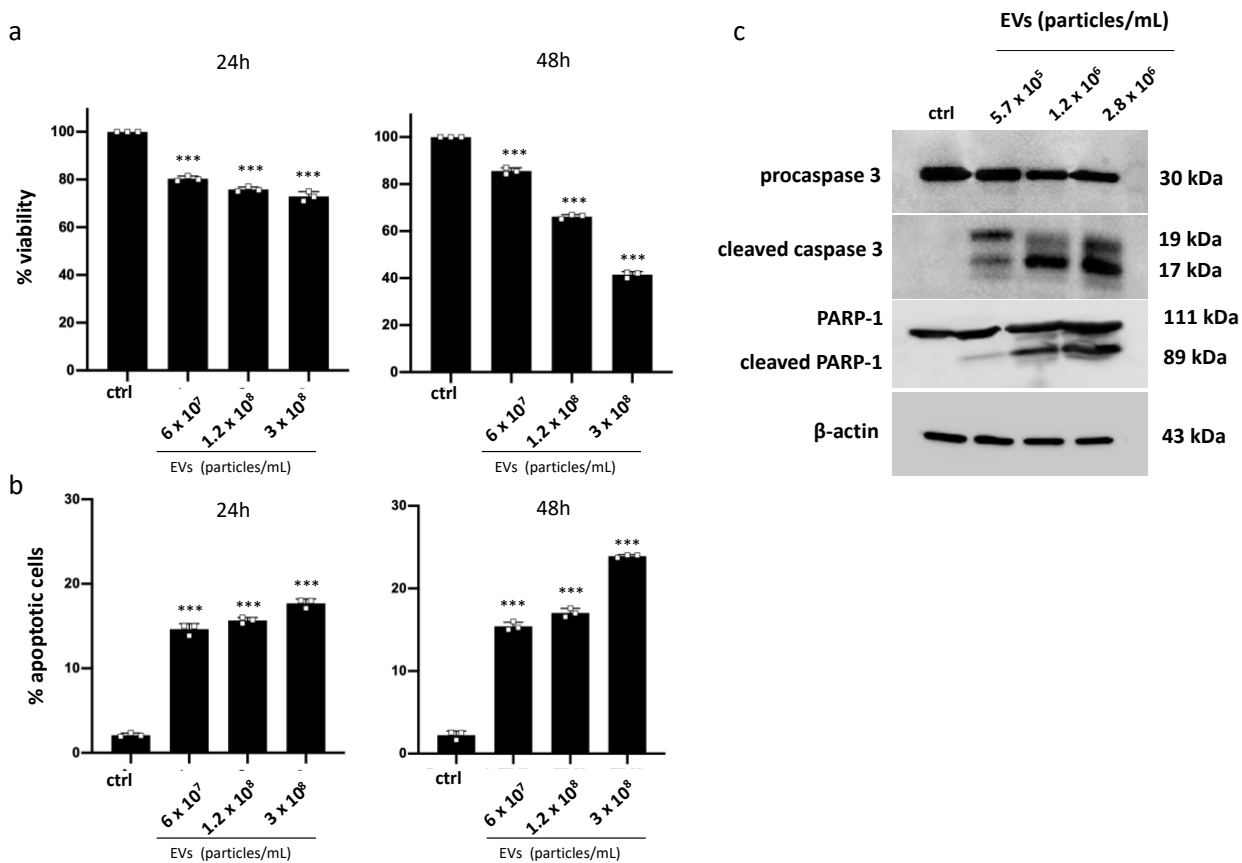

Figure S10. Effects of HR-derived EVs after 24 h and 48 h incubation in MCF-7 breast cancer cells. **a** MTT colorimetric assay on MCF-7 cells after 24 h (left) and 48 h (right) of EV treatments, respectively. **b** Analyses of apoptotic cells by cytofluorimetric assay in EVs-treated MCF-7 cells upon 24 h and 48 h exposure (left and right bar chart, respectively). The values reported in the graphs are the mean  $\pm$  SD from at least 3 independent experiments performed in technical triplicates. The asterisks denote significant differences between treatments and untreated controls (\*  $p < 0.05$ ; \*\*  $p < 0.01$ ; \*\*\*  $p < 0.001$ ) according to Student's *t* test. **c** Western blot analyses of protein extracts from MCF-7 cells treated for 24 h with different EV concentrations.

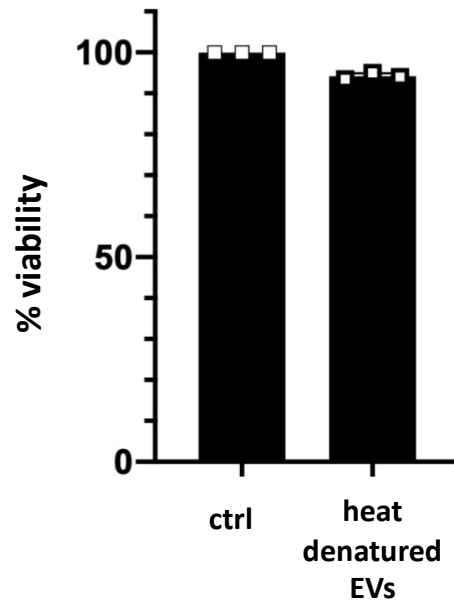

Figure S11. Effects of heat-denatured HR-released EVs ( $3 \times 10^8$  particle/mL) on MCF-7 viability after 24 h incubation. The values were presented as means  $\pm$  SD of three independent experiments carried out in triplicate

procaspase 3 in MIA PaCa-2 cells

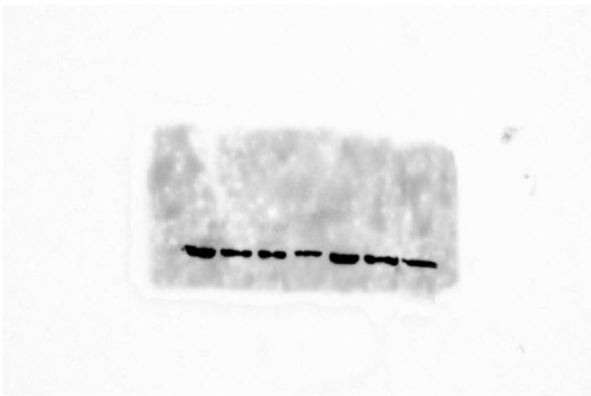

PARP-1 in MIA PaCa-2 cells

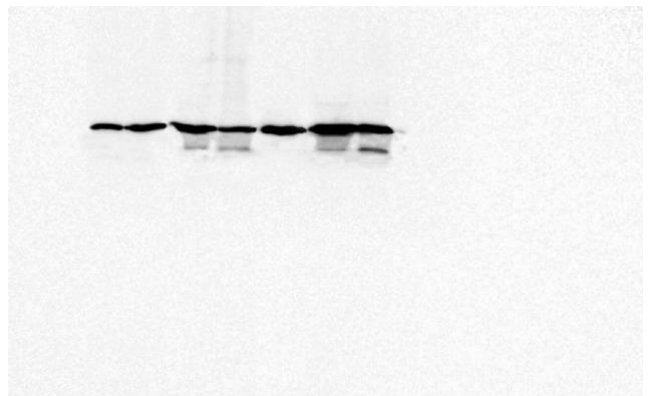

Cleaved caspase 3 in MIA PaCa-2 cells

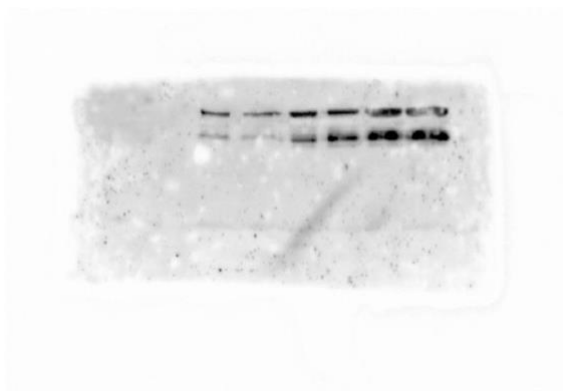

$\beta$ -actin in MIA PaCa-2

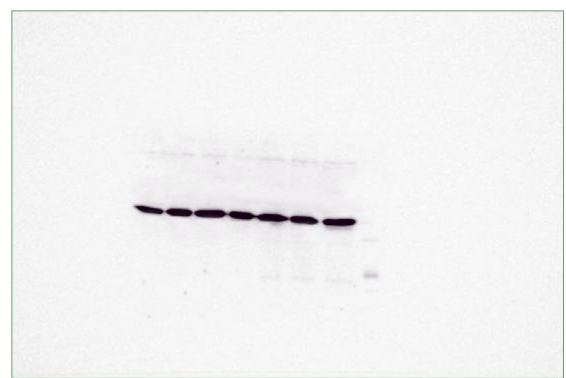

Figure S12. Uncropped images of western blots reported in figure 3.

procaspase 3 in MCF7 cells

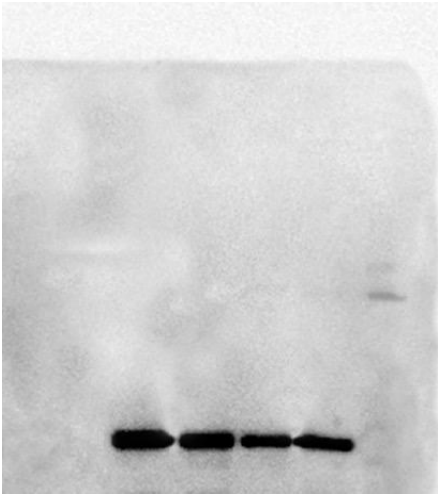

PARP-1 in MCF7 cells

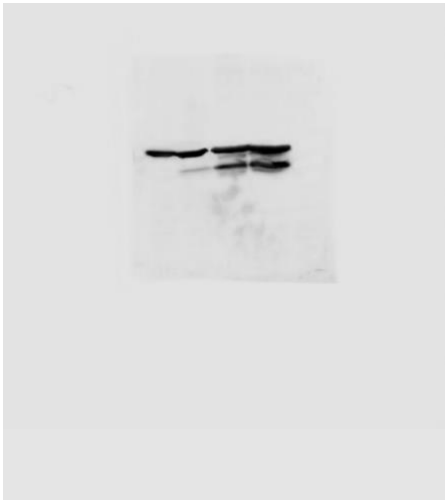

cleaved caspase 3 MCF7 cells

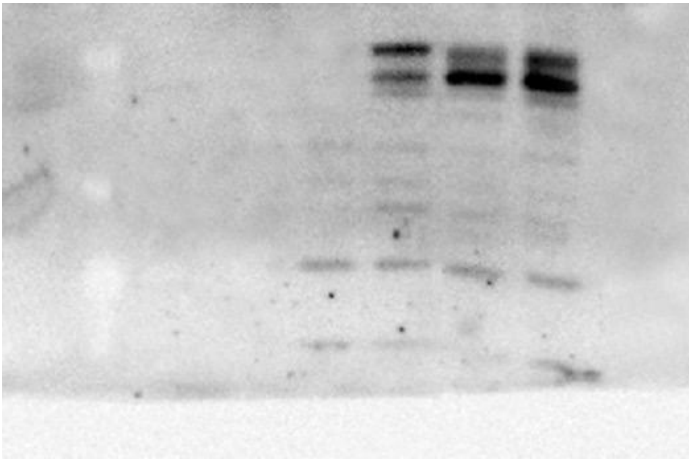

Actin of PARP-1 filter

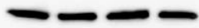

Actin of caspase3 filter

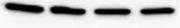

Figure S13. Uncropped images of western blots reported in figure S10.
