# Supplementary material for: Plant hairy roots for the production of extracellular vesicles with antitumor bioactivity
Source: PubMed Central journal article supplement (PMC9392725; doi:10.1038/s42003-022-03781-3), 2022-08-20
Supplement: 42003_2022_3781_MOESM3_ESM.pdf [file 42003_2022_3781_MOESM3_ESM.pdf]

## Description of Additional Supplementary Files

**File name:** Supplementary Data 1

**Description:** The list of proteins commonly found in the EV preparations and in the nonvesicular fractions.

**File name:** Supplementary Data 2

**Description:** Raw data of biological assays reported in the main figures
